# Supplementary material for: Combining benzalkonium chloride addition with filtration to inhibit dissolved inorganic carbon alteration during the preservation of seawater in radiocarbon analysis
Source: Copernicus journal article supplement (doi:10.5194/egusphere-2024-3349), 2024-11-06
Supplement: Supplementary file 1 [file egusphere-2024-3349-supplement.pdf]

**Table S1: Chemical compositions of SW and GW measured by the ion chromatography at the Geological Survey of Japan, AIST.**

| sample | Na <sup>+</sup> (mg·L <sup>-1</sup> ) | K <sup>+</sup> (mg·L <sup>-1</sup> ) | Mg <sup>2+</sup> (mg·L <sup>-1</sup> ) | Ca <sup>2+</sup> (mg·L <sup>-1</sup> ) | Cl <sup>-</sup> (mg·L <sup>-1</sup> ) | SO <sub>4</sub> <sup>2-</sup> (mg·L <sup>-1</sup> ) |
|--------|---------------------------------------|--------------------------------------|----------------------------------------|----------------------------------------|---------------------------------------|-----------------------------------------------------|
| SW     | 6378                                  | 224                                  | 738                                    | 245                                    | 11216                                 | 1582                                                |
| GW     | 9.5                                   | 5.3                                  | 6.6                                    | 17.1                                   | 8.9                                   | 0.9                                                 |

**Table S2: <sup>14</sup>C concentration and δ<sup>13</sup>C value of NaHCO<sub>3</sub>-unfiltered, NaHCO<sub>3</sub>-PES and NaHCO<sub>3</sub>-GF. Because the changes in <sup>14</sup>C concentration are small, they are intentionally listed to two decimal places.**

| sample                         | <sup>14</sup> C (pMC) | δ <sup>13</sup> C (‰) |
|--------------------------------|-----------------------|-----------------------|
| NaHCO <sub>3</sub> -unfiltered | 1.95 ± 0.19           | -5.13 ± 0.02          |
| NaHCO <sub>3</sub> -unfiltered | 1.95 ± 0.19           | -5.14 ± 0.01          |
| NaHCO <sub>3</sub> -PES        | 2.04 ± 0.19           | -5.22 ± 0.02          |
| NaHCO <sub>3</sub> -GF         | 1.94 ± 0.19           | -5.26 ± 0.02          |
| NaHCO <sub>3</sub> -GF         | 1.92 ± 0.19           | -5.16 ± 0.02          |

**Table S3: DIC concentration, <sup>14</sup>C concentration, and δ<sup>13</sup>C values for SW and GW. NA: not analyzed because of experimental error of CO<sub>2</sub> extraction. \*: not use for discussion.**

| sample      | DIC (mg·L <sup>-1</sup> ) | <sup>14</sup> C (pMC, upper) / δ <sup>13</sup> C (‰, lower) |                |                |                     |
|-------------|---------------------------|-------------------------------------------------------------|----------------|----------------|---------------------|
|             | <i>Initial</i>            | <i>initial</i>                                              | <i>14 days</i> | <i>28 days</i> | <i>126/285 days</i> |
| SW-Control  | 43.7                      | 41.2 ± 0.3                                                  | 64.4 ± 0.4     | 77.2 ± 0.5     | 91.2 ± 0.4          |
|             |                           | -4.04 ± 0.02                                                | -11.51 ± 0.01  | -15.94 ± 0.02  | -19.80 ± 0.00       |
| SW-BAC      | 43.2                      | 42.2 ± 0.3                                                  | 42.1 ± 0.3     | 46.4 ± 0.4     | 57.4 ± 0.2          |
|             |                           | -3.97 ± 0.02                                                | -4.24 ± 0.02   | -5.45 ± 0.01   | -9.11 ± 0.01        |
| SW-PTFE     | 43.6                      | 41.9 ± 0.3                                                  | 59.2 ± 0.4     | 61.8 ± 0.4     | 88.3 ± 0.3          |
|             |                           | -4.05 ± 0.01                                                | -9.14 ± 0.01   | -10.43 ± 0.01  | -18.76 ± 0.02       |
| SW-PES      | 43.8                      | 41.4 ± 0.3                                                  | NA             | 64.9 ± 0.4     | 70.6 ± 0.3          |
|             |                           | -3.72 ± 0.01                                                | NA             | -10.88 ± 0.01  | -14.85 ± 0.02       |
| SW-PTFE+BAC | 43.2                      | 41.5 ± 0.3                                                  | 42.1 ± 0.3     | 41.9 ± 0.3     | 41.9 ± 0.2          |
|             |                           | -4.00 ± 0.02                                                | -3.63 ± 0.02   | -4.25 ± 0.01   | -3.78 ± 0.01        |
| SW-PES+BAC  | 43.1                      | 41.4 ± 0.3                                                  | 41.9 ± 0.3     | 42.1 ± 0.3     | 41.6 ± 0.2          |
|             |                           | -3.87 ± 0.01                                                | -3.76 ± 0.01   | -3.88 ± 0.02   | -3.68 ± 0.02        |
| GW-Control  | 59.1                      | 10.2 ± 0.1                                                  | 19.2 ± 0.2     | 33.8 ± 0.4     | 46.1 ± 0.3          |
|             |                           | -5.98 ± 0.01                                                | -5.93 ± 0.02   | -4.61 ± 0.01   | -5.61 ± 0.01        |
| GW-BAC      | 54.2                      | 10.8 ± 0.1                                                  | 10.6 ± 0.1     | 10.4 ± 0.1     | 10.9 ± 0.1          |
|             |                           | -6.00 ± 0.02                                                | -5.96 ± 0.01   | -5.96 ± 0.01   | -5.96 ± 0.01        |
| GW-PTFE     | 53.7                      | 10.5 ± 0.1                                                  | 13.7 ± 0.2     | 14.4 ± 0.2     | NA                  |
|             |                           | -6.00 ± 0.02                                                | -6.74 ± 0.01   | -6.94 ± 0.01   | NA                  |
| GW-PES      | 55.7                      | 10.7 ± 0.1                                                  | 13.7 ± 0.2     | 13.3 ± 0.2     | 14.3 ± 0.1          |
|             |                           | -5.98 ± 0.02                                                | -6.70 ± 0.01   | -6.65 ± 0.01   | -6.64 ± 0.01        |
| GW-PTFE+BAC | 54.7                      | 10.5 ± 0.1                                                  | 11.0 ± 0.1     | 10.2 ± 0.1     | 10.4 ± 0.1          |
|             |                           | -5.99 ± 0.02                                                | -5.98 ± 0.01   | -5.96 ± 0.01   | -5.97 ± 0.01        |
| GW-PES+BAC  | 55.1                      | 10.9 ± 0.1                                                  | 10.7 ± 0.1     | 10.6 ± 0.1     | 10.6 ± 0.1          |
|             |                           | -5.98 ± 0.01                                                | -5.96 ± 0.01   | -5.96 ± 0.01   | -5.96 ± 0.01        |
