# Supplementary material for: Combining benzalkonium chloride addition with filtration to inhibit dissolved inorganic carbon alteration during the preservation of seawater in radiocarbon analysis
Source: Copernicus journal article supplement (doi:10.5194/egusphere-2024-3349), 2024-11-06
Supplement: Supplementary file [file egusphere-2024-3349-AC1-supplement.pdf]

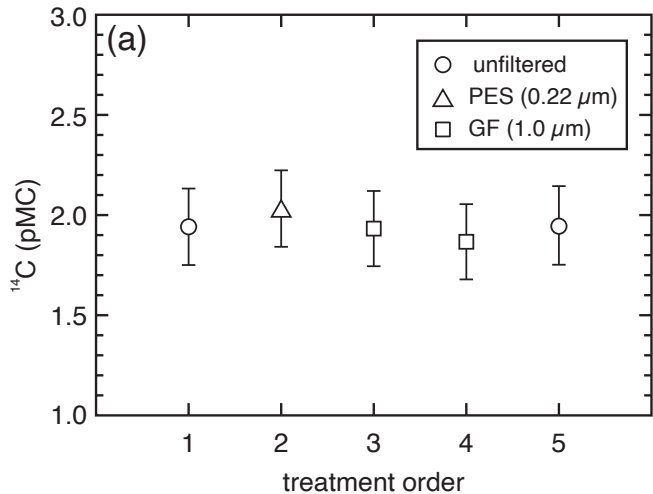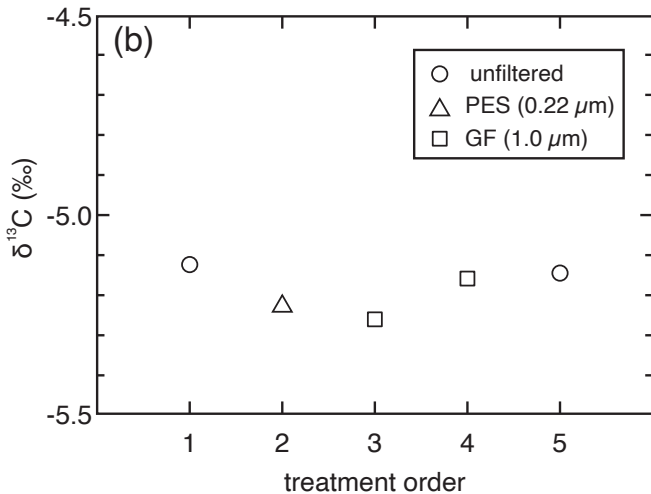

**Figure 1: Comparisons of  $^{14}\text{C}$  (a) and  $\delta^{13}\text{C}$  (b) among the unfiltered and filtered solutions of  $1 \text{ mmol}\cdot\text{L}^{-1}$  of  $\text{NaHCO}_3$ . PES: filtered by PES disk filter (25 mm in diameter,  $0.22 \mu\text{m}$  in pore size), GF: filtered by GF disk filter (25 mm in diameter,  $1.0 \mu\text{m}$  in pore size). Each value of  $^{14}\text{C}$  and  $\delta^{13}\text{C}$  represents a single treatment occasion. The bars of  $^{14}\text{C}$  concentration were represented the measurement error of the AMS analysis. The  $\delta^{13}\text{C}$  error is smaller than the plotting symbols.**
